# Supplementary figures and images for: Mahalanobis distances for ecological niche modelling and outlier detection: implications of sample size, error, and bias for selecting and parameterising a multivariate location and scatter method
Source: PeerJ journal article supplement (doi:10.7717/peerj.11436), 2021-05-11

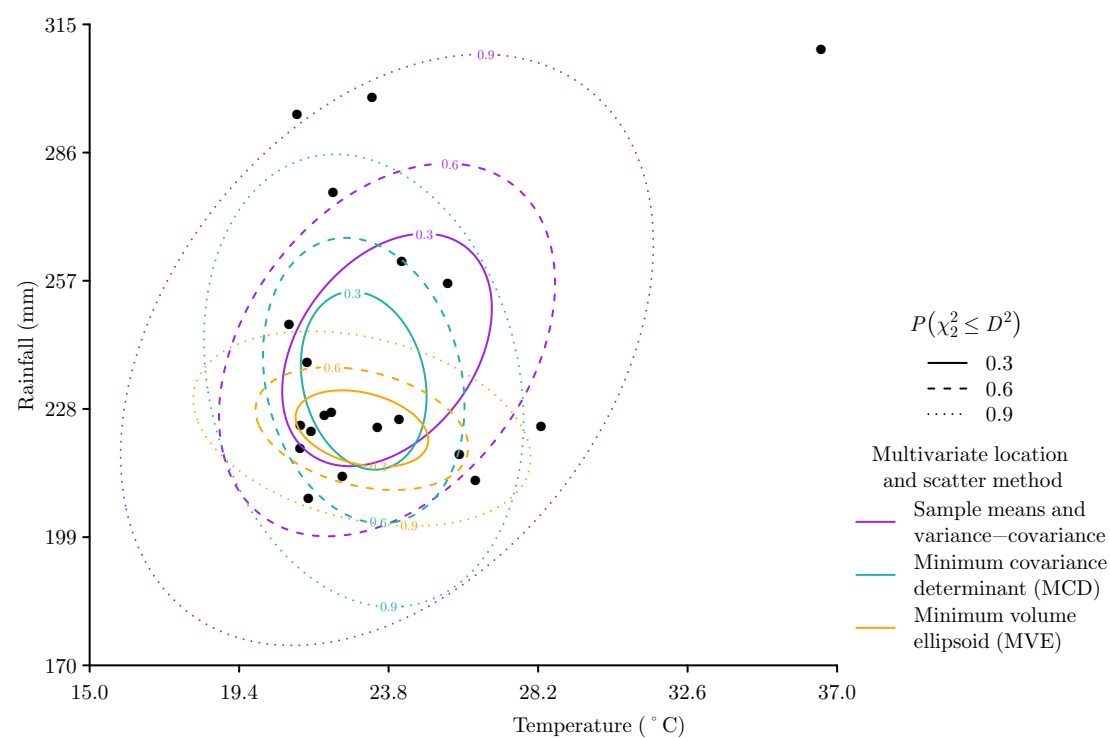

Supplement: data-and-code.zip [file data-and-code.zip]

(a)  $k=0.55$ 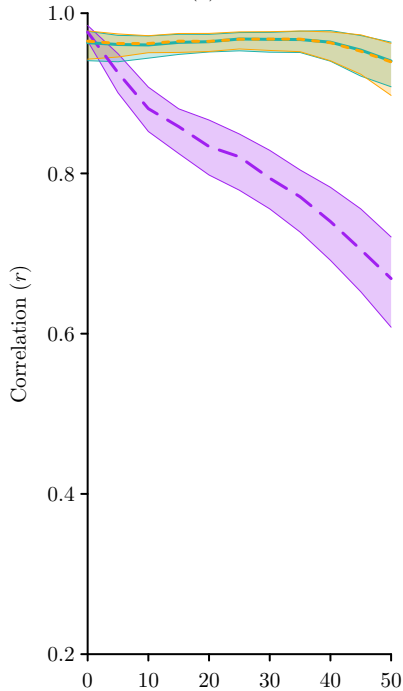(b)  $k=0.75$ 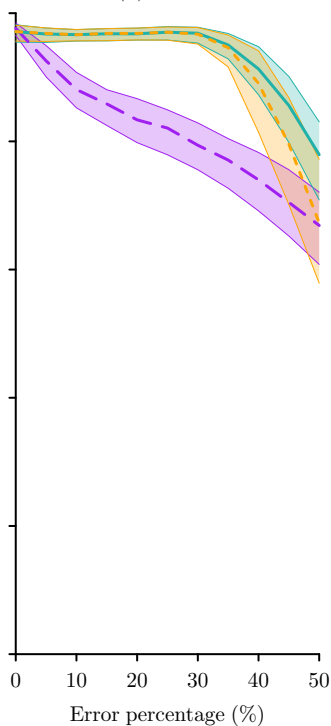(c)  $k=0.95$ 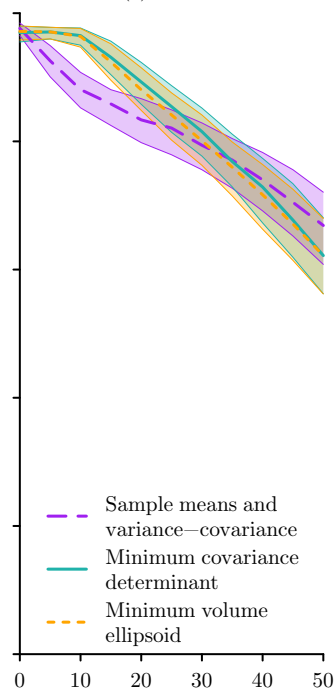

Supplement: data-and-code.zip [file data-and-code.zip]

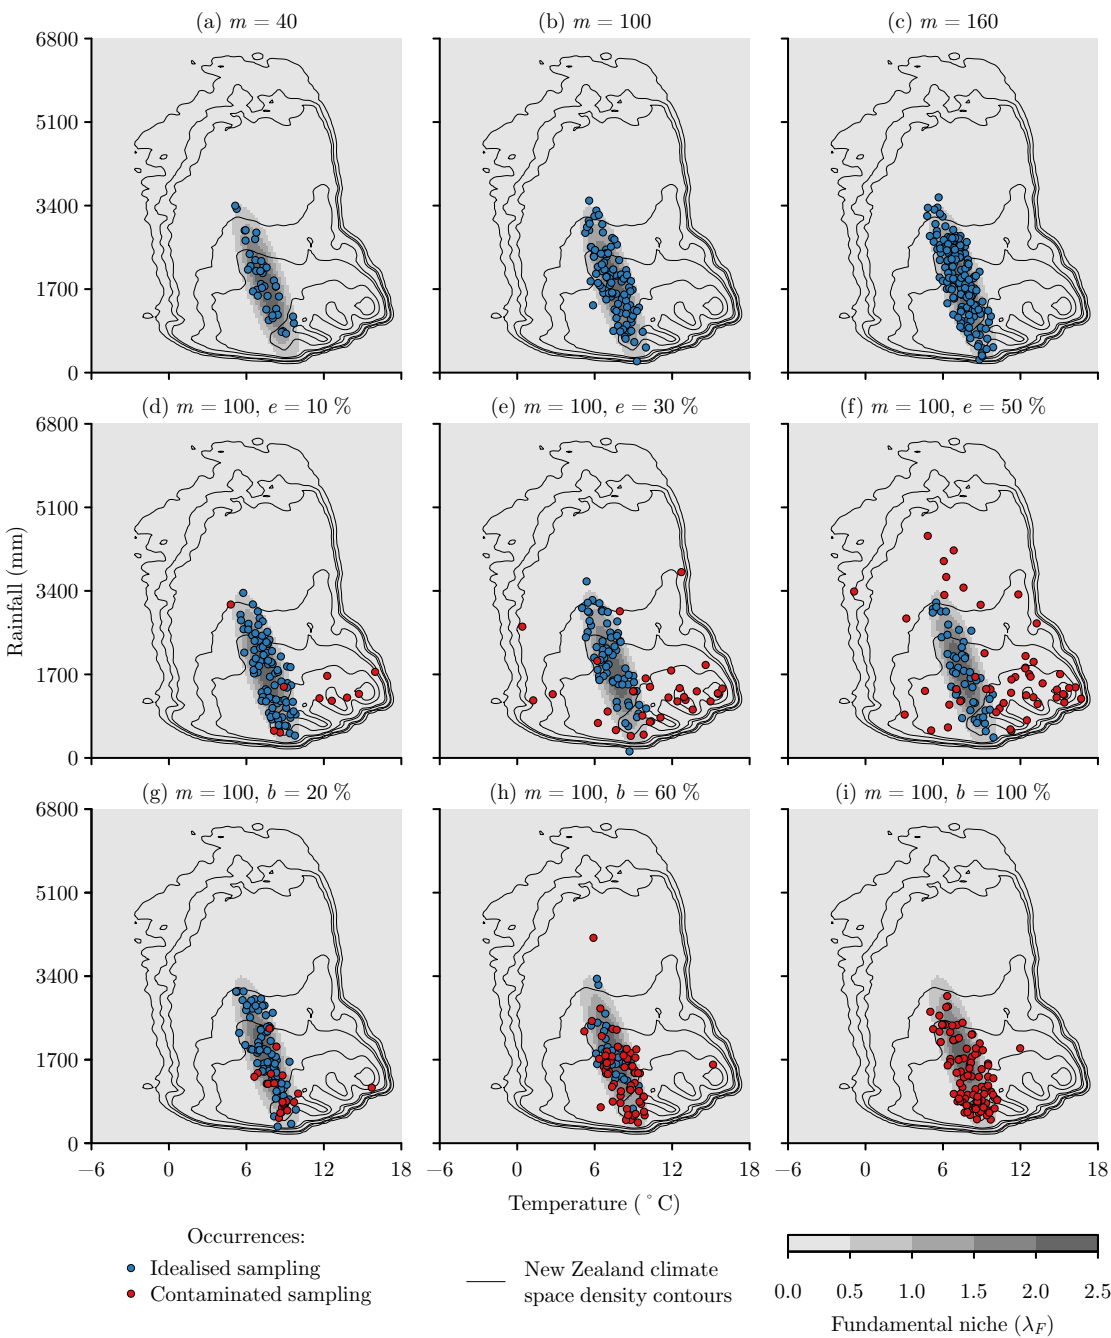

Supplement: data-and-code.zip [file data-and-code.zip]

(a)  $k=0.55$ 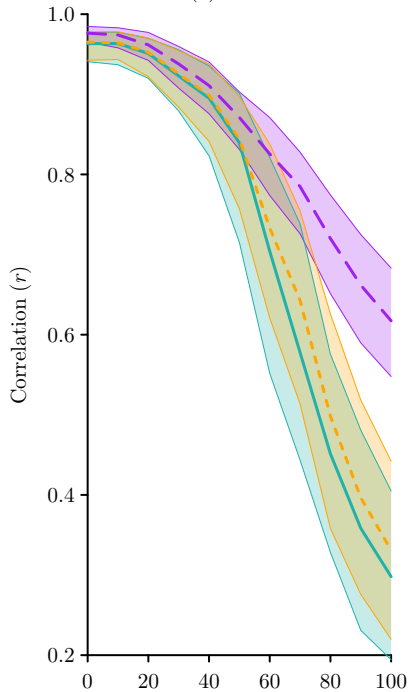(b)  $k=0.75$ 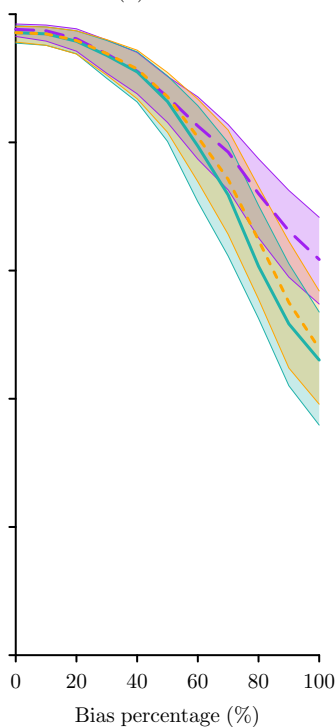(c)  $k=0.95$ 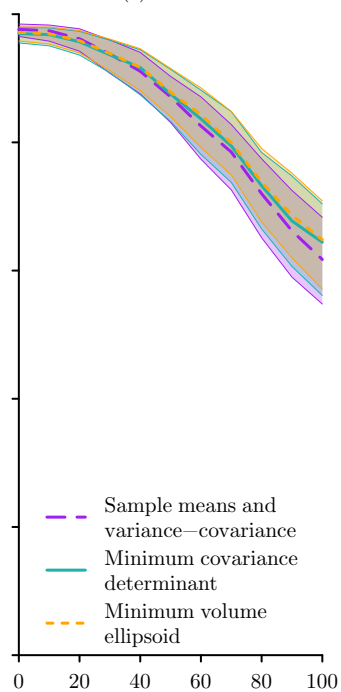

Supplement: data-and-code.zip [file data-and-code.zip]

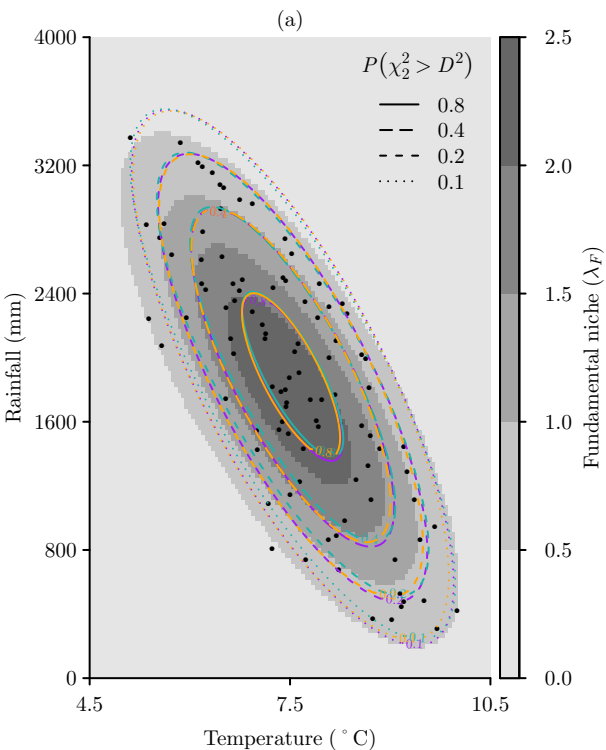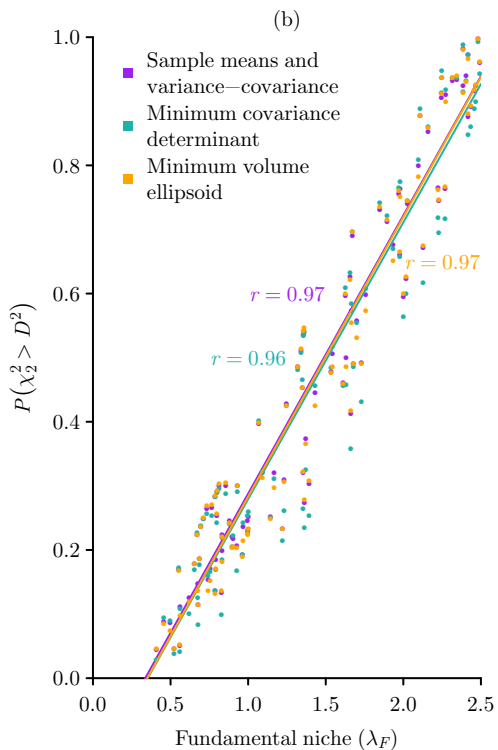

Supplement: data-and-code.zip [file data-and-code.zip]

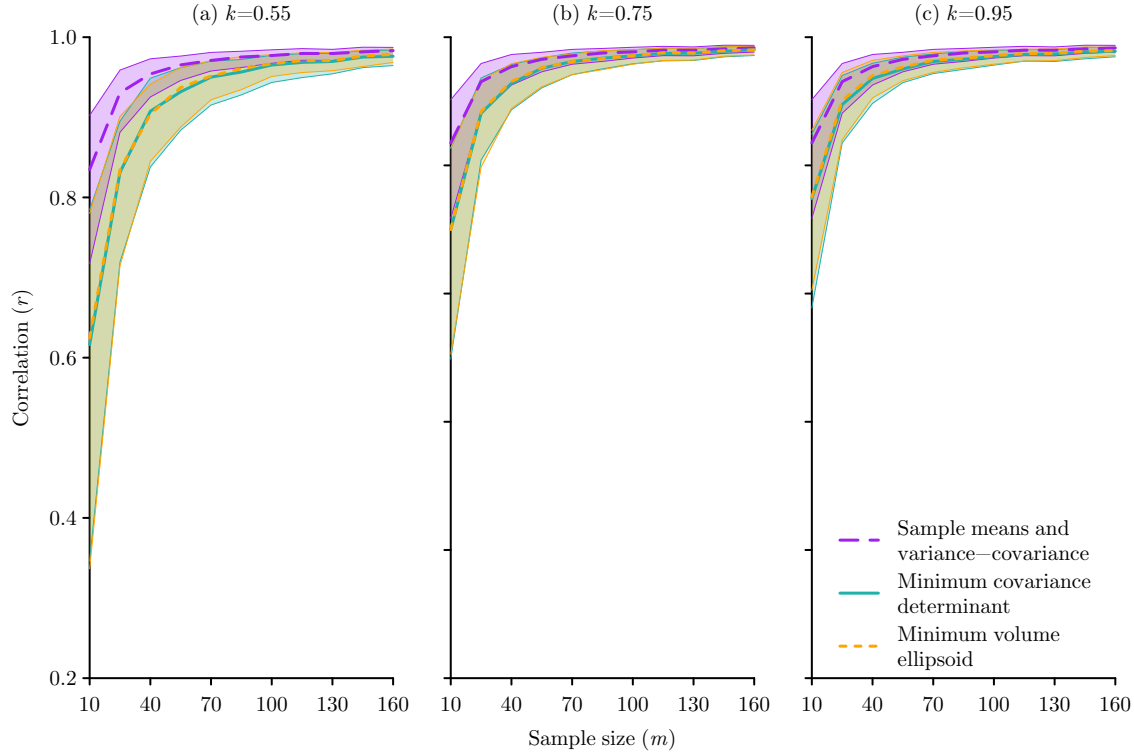

Supplement: data-and-code.zip [file data-and-code.zip]
